# Supplementary material
Source: publisher figshare collection journal article supplement (https://frontiersin.figshare.com/ndownloader/files/31557788)
Supplement: Supplementary file [file 31557788]

**Supplementary Table 6: List of selected downregulated genes involved in different metabolic pathway of SIV infected enteroids compared to uninfected enteroids**

| Pathway                  | Gene   | Protein                                                             | Log2 fold change | Biological function                                                                                  |
|--------------------------|--------|---------------------------------------------------------------------|------------------|------------------------------------------------------------------------------------------------------|
| Glycolysis               | PDHA1  | Pyruvate Dehydrogenase E1 Subunit Alpha 1                           | 1.5              | Converts pyruvate to acetyl-coA                                                                      |
|                          | PDHB   | Pyruvate Dehydrogenase E1 Subunit Beta                              | 2.6              | Converts pyruvate to acetyl-coA                                                                      |
|                          | PGAM1  | Phosphoglycerate Mutase 1                                           | 2                | Conversion of 3-phosphoglycerate to 2-phosphoglycerate                                               |
|                          | ENO2   | Enolase 2                                                           | 3.3              | Dehydration of 2-phosphoglycerate to phosphoenolpyruvate                                             |
|                          | HK1    | Hexokinase 1                                                        | 2.1              | Catalyzes the phosphorylation of various hexoses                                                     |
|                          | PFKL   | Phosphofructokinase, Liver Type                                     | 2.3              | Conversion of fructose-6-phosphate to fructose-1,6-bisphosphate                                      |
|                          | PGK1   | Phosphoglycerate Kinase 1                                           | 3.8              | Transfer of a phosphate group from 1,3-bisphosphoglycerate (1,3-BPG) to ADP                          |
|                          |        | Aldolase A                                                          |                  | Conversion of fructose 1-6-diphosphate to glyceraldehyde 3-phosphate and dihydroxy-acetone phosphate |
|                          | ALDO A |                                                                     | 1.6              |                                                                                                      |
|                          |        | Aldolase B                                                          |                  | Conversion of fructose 1-6-diphosphate to glyceraldehyde 3-phosphate and dihydroxy-acetone phosphate |
| Pyruvate metabolism      | ALDO B |                                                                     | 3.3              |                                                                                                      |
|                          |        | Aldolase C                                                          |                  | Conversion of fructose 1-6-diphosphate to glyceraldehyde 3-phosphate and dihydroxy-acetone phosphate |
|                          | ALDO C |                                                                     | 3.2              |                                                                                                      |
|                          | PGM1   | Phosphoglucomutase 1                                                | 1.5              | Transfer of phosphate from position 1 to 6 on glucose                                                |
|                          | ACSS 1 | Acyl-CoA Synthetase Short Chain Family Member 1                     | 1.9              | Synthesis of acetyl-CoA                                                                              |
|                          | ACSS 2 | Acyl-CoA Synthetase Short Chain Family Member 2                     | 2.4              | Synthesis of acetyl-CoA                                                                              |
|                          | PDHA1  | Pyruvate Dehydrogenase E1 Subunit Alpha 1                           | 1.5              | Conversion of pyruvate to acetyl-CoA                                                                 |
|                          | PDHB   | Pyruvate Dehydrogenase E1 Subunit Beta                              | 2.6              | Conversion of pyruvate to acetyl-CoA                                                                 |
| Fatty acid metabolism    | LDH A  | Lactate Dehydrogenase A                                             | 2.6              | Synthesizes (S)-lactate from pyruvate                                                                |
|                          | LDH D  | Lactate Dehydrogenase D                                             | 1.9              | Synthesizes (S)-lactate from pyruvate                                                                |
|                          | DLAT   | Dihydrolipoamide S-Acetyltransferase                                | 1.5              | Conversion of pyruvate to acetyl-CoA                                                                 |
|                          | PCK2   | Phosphoenolpyruvate Carboxykinase                                   | 2.3              | Converts oxaloacetate into phosphoenolpyruvate and carbon dioxide                                    |
|                          | PECR   | Peroxisomal trans-2-enoyl-CoA reductase                             | 2.1              | Chain elongation of fatty acids                                                                      |
|                          | ACAA2  | 3-ketoacyl-CoA thiolase, mitochondrial                              | 1.4              | Production of energy from fats                                                                       |
|                          | OXSM   | 3-oxoacyl-[acyl-carrier-protein] synthase, mitochondrial            | 4.2              | Biosynthesis of lipoic acid as well as longer chain fatty acids                                      |
|                          | ACSL4  | Long-chain-fatty-acid--CoA ligase 4                                 | 1.9              | Conversion of long-chain fatty acids to their active form acyl-CoA                                   |
|                          | MCAT   | Malonyl-CoA-acyl carrier protein transacylase,                      | 2.3              | Transfer of a malonyl moiety from malonyl-CoA                                                        |
|                          | ACADSB | Short/branched chain specific acyl-CoA dehydrogenase, mitochondrial | 3.1              | Formation of trans-2-enoyl-CoA                                                                       |
| Ketone bodies metabolism | HADH A | Trifunctional enzyme subunit alpha, mitochondrial                   | 2                | Mitochondrial beta-oxidation pathway                                                                 |
|                          | HADH B | Trifunctional enzyme subunit alpha, mitochondrial                   | 3.3              | Mitochondrial beta-oxidation pathway                                                                 |
|                          | ACOX3  | Peroxisomal acyl-coenzyme A oxidase 3                               | 2.6              | Oxidizes the CoA-esters of 2-methyl-branched fatty acids                                             |
|                          | ACADM  | Medium-chain specific acyl-CoA dehydrogenase, mitochondrial         | 4.3              | Mitochondrial fatty acid beta-oxidation                                                              |
|                          | HADH   | Hydroxyacyl-CoA Dehydrogenase                                       | 2.6              | Beta-oxidation cycle for medium and short-chain 3-hydroxy fatty acyl-CoAs                            |
|                          | ACADS  | Short-chain specific acyl-                                          | 2.2              | Mitochondrial fatty acid beta-oxidation                                                              |
|                          | BDH1   | D-beta-hydroxybutyrate dehydrogenase                                | 2                | Conversion of 3-hydroxybutanoate to acetoacetate and NADH                                            |
|                          | BDH2   | 3-hydroxybutyrate dehydrogenase type 2                              | 3.5              | Conversion of 3-hydroxybutanoate to acetoacetate and NADH                                            |
|                          |        | Hydroxymethylglutaryl-CoA synthase, cytoplasmic                     |                  | Condensation of acetyl-CoA with acetoacetyl-CoA to form HMG-CoA                                      |
|                          | HMGCS1 | Succinyl-CoA:3-ketoacid coenzyme A transferase 1                    | 3.4              |                                                                                                      |
|                          | OXCT1  | 3-Oxoacid CoA-Transferase 1                                         | 3.9              | Key enzyme for ketone body catabolism                                                                |
